# Supplementary material
Source: Springer Nature journal article supplement (https://www.springermedizin.de/resource/supplementary/13618_2012_45_MOESM2_ESM.pdf/9681036)

**(a)**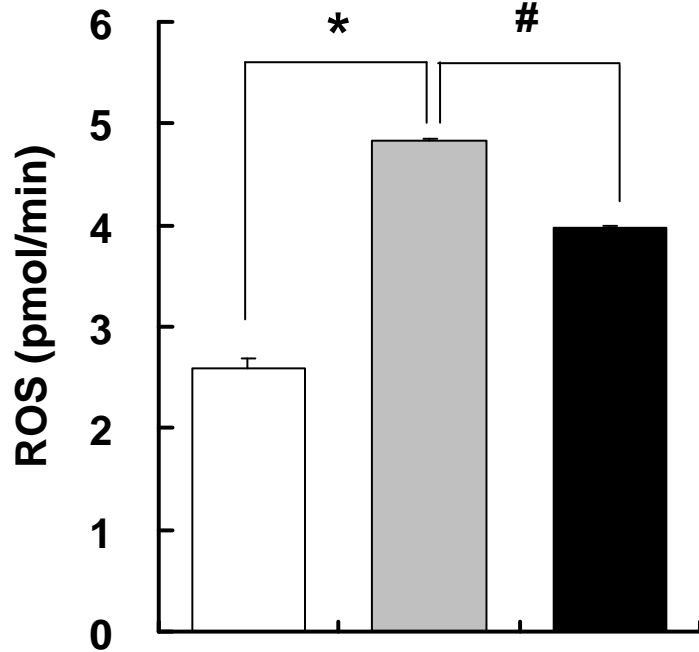

|                                    |   |   |   |
|------------------------------------|---|---|---|
| FeSO <sub>4</sub> (mM)             | 0 | 2 | 2 |
| H <sub>2</sub> O <sub>2</sub> (mM) | 0 | 5 | 5 |
| HRW                                | - | - | + |

**(b)**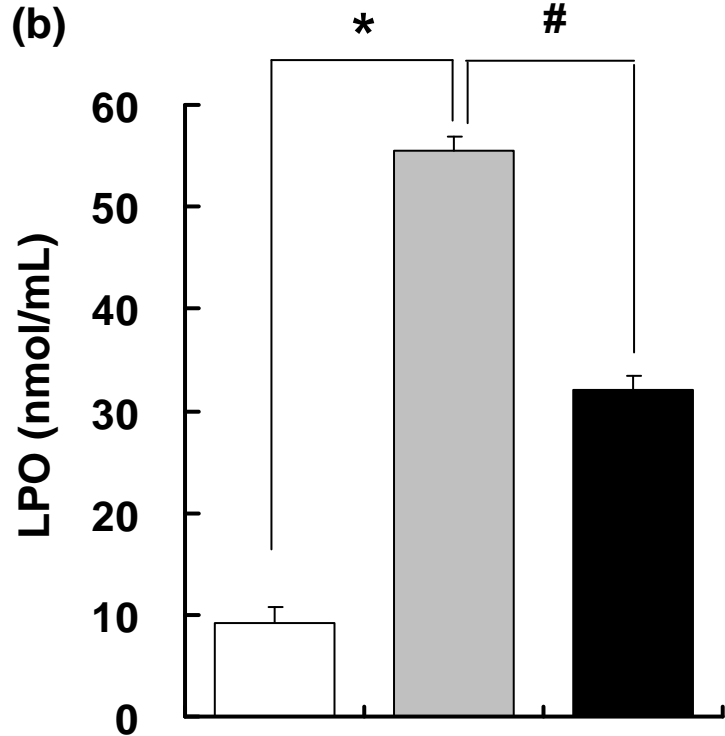

|                                    |   |   |   |
|------------------------------------|---|---|---|
| FeSO <sub>4</sub> (mM)             | 0 | 2 | 2 |
| H <sub>2</sub> O <sub>2</sub> (mM) | 0 | 5 | 5 |
| HRW                                | - | - | + |

Supplement: MOESM2 [file 9681036]
